# Supplementary material for: A Virus-Packageable CRISPR System Identifies Host Dependency Factors Co-Opted by Multiple HIV-1 Strains
Source: PubMed Central journal article supplement (PMC9973025; doi:10.1128/mbio.00009-23), 2023-02-06

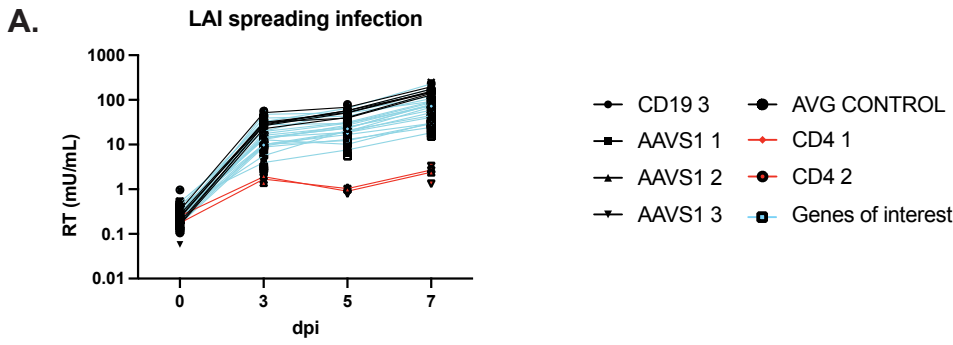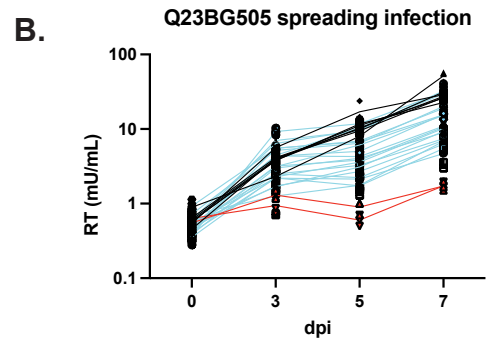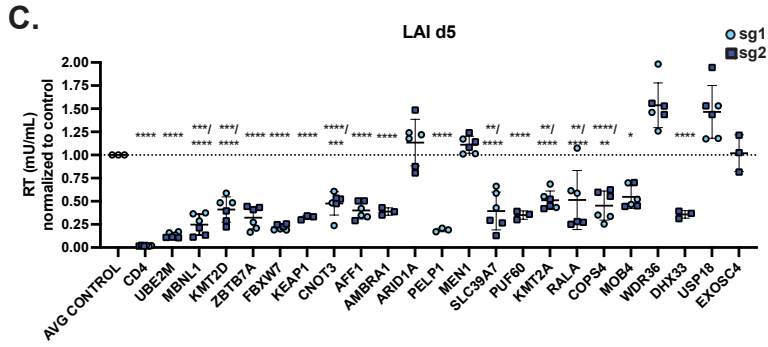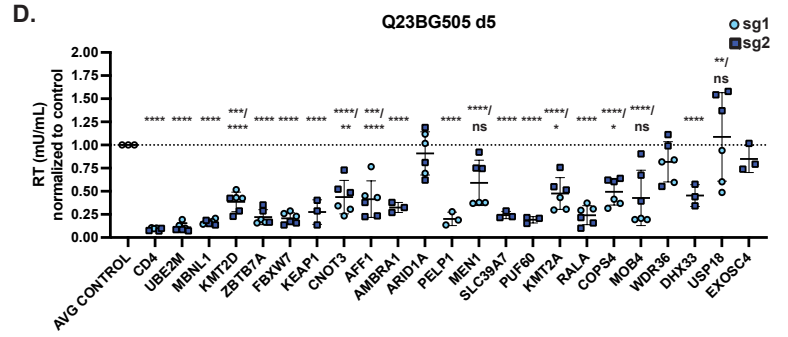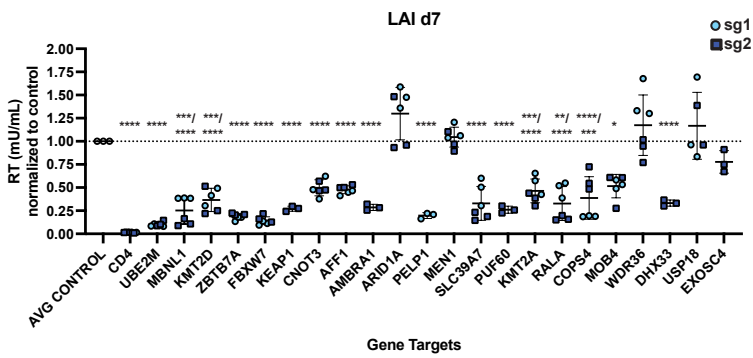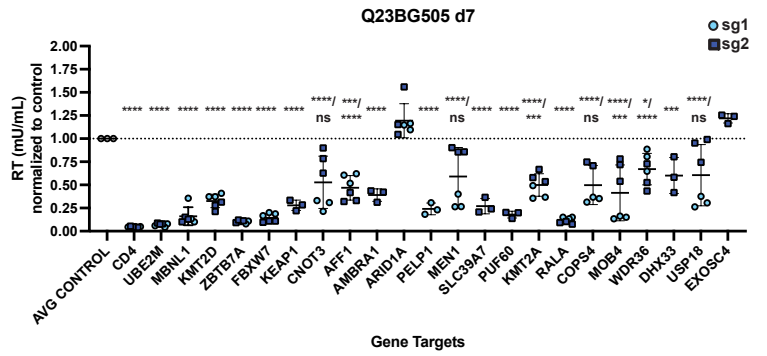

Supplement: mbio.00009-23-sf002.pdf [file mbio.00009-23-sf002.pdf]
