# Supplementary material for: A Virus-Packageable CRISPR System Identifies Host Dependency Factors Co-Opted by Multiple HIV-1 Strains
Source: PubMed Central journal article supplement (PMC9973025; doi:10.1128/mbio.00009-23), 2023-02-06
Supplement: mbio.00009-23-sf003.pdf [file mbio.00009-23-sf003.pdf]

**A.**

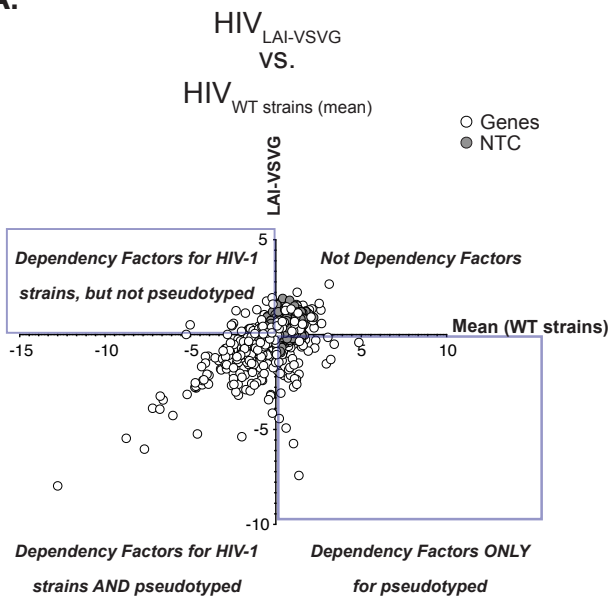

**B.**

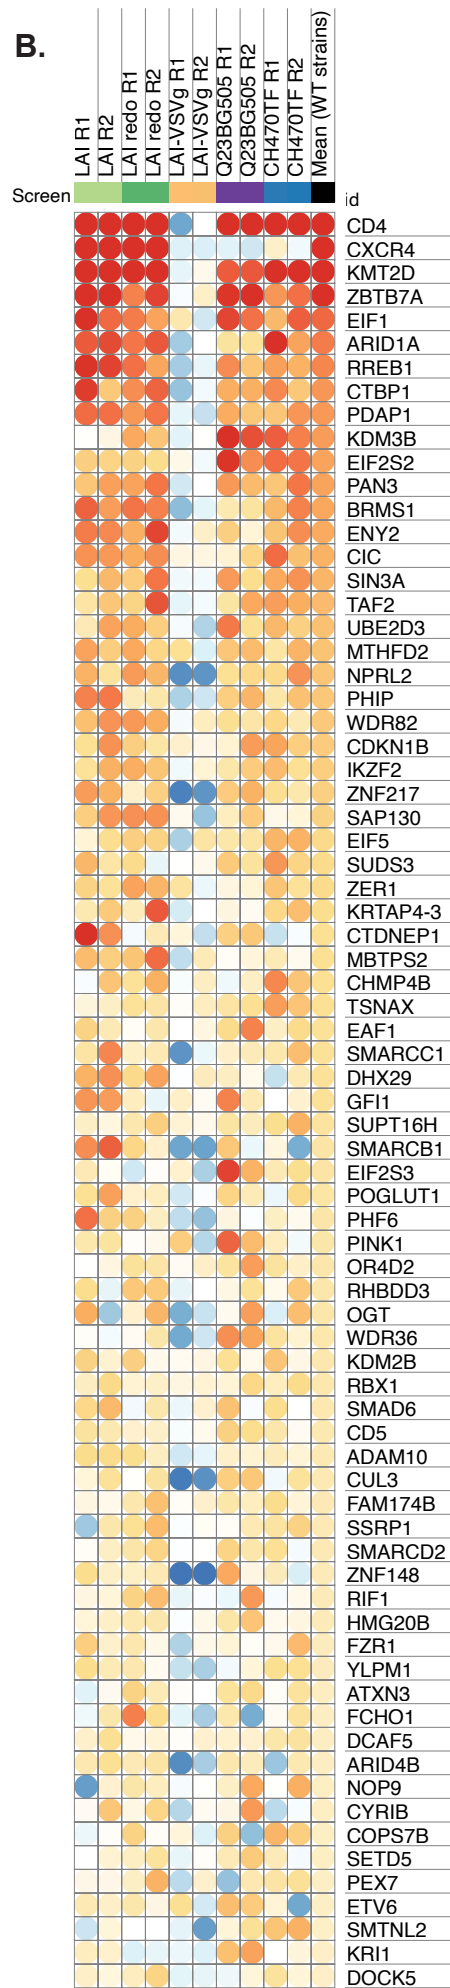

**C.**

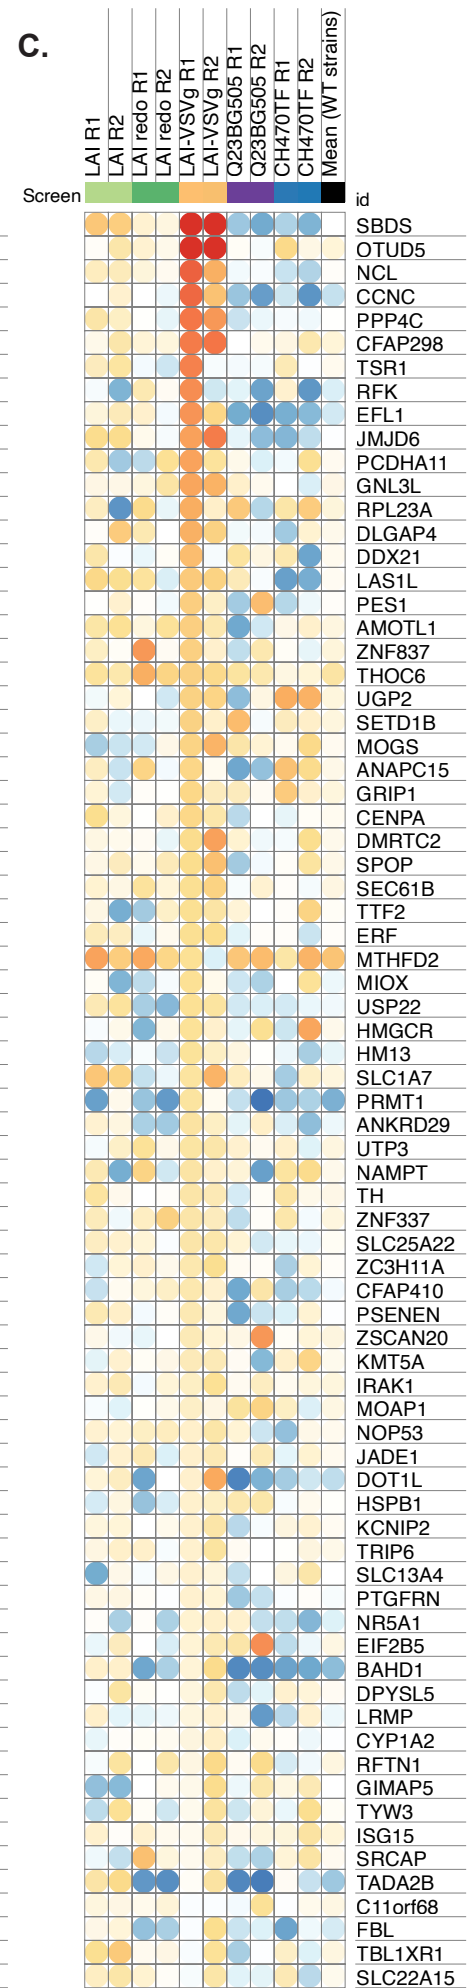

>=4 3 2 1 0 -1 -2 -3 <=-4
